# Supplementary material
Source: PubMed Central journal article supplement (PMC4837022)
Supplement: NIHMS762029-supplement-1.pdf [file NIHMS762029-supplement-1.pdf]

**Supplementary Information for:**

**Essential biphasic role for JAK3 catalytic activity in IL-2 receptor signaling**

Geoffrey A. Smith<sup>1,2</sup>, Kenji Uchida<sup>1†</sup>, Arthur Weiss<sup>2,3</sup> and Jack Taunton<sup>1\*</sup>

<sup>1</sup>Department of Cellular and Molecular Pharmacology, University of California, San Francisco, California, USA. <sup>2</sup>Rosalind Russell and Ephraim P. Engleman Arthritis Research Center, Division of Rheumatology, Department of Medicine, University of California, San Francisco, California, USA. <sup>3</sup>Howard Hughes Medical Institute, University of California, San Francisco, California, USA.

† Present Address: Chemical Research Laboratories, R&D Division, Kyowa Hakko Kirin Co., Ltd.

\*e-mail: [jack.taunton@ucsf.edu](mailto:jack.taunton@ucsf.edu)

## Supplementary Results

## Supplementary Tables

Supplementary Table 1 | In vitro selectivity profile among JAK-family (100  $\mu$ M ATP)

| Kinase | IC <sub>50</sub> (nM) |
|--------|-----------------------|
| JAK1   | 1,520                 |
| JAK2   | 8,680                 |
| JAK3   | 0.43                  |
| TYK2   | >10,000               |

**Supplementary Table 2 | In vitro selectivity profile among kinases with similar cysteine (1 mM ATP)**

| <b>Kinase</b> | <b>IC<sub>50</sub> (nM)</b> |
|---------------|-----------------------------|
| JAK3          | 7.43 nM                     |
| BTK           | 363 nM                      |
| ITK           | 4630 nM                     |
| EGFR          | >10 $\mu$ M                 |

**Supplementary Table 3 | Cellular effects of JAK3i and tofacitinib.**

|                    | <b>JAK3i</b>        | <b>Tofacitinib<br/>(pan-JAKi)</b> |
|--------------------|---------------------|-----------------------------------|
| pSTAT5<br>(15 min) | 47.2 ± 4.5<br>(n=5) | 24.7 ± 5.7<br>(n=8)               |
| CD25               | 3.1 ± 0.9<br>(n=7)  | 7.7 ± 4.9<br>(n=7)                |
| proliferation      | 3.7 ± 1.6<br>(n=9)  | 12.5 ± 5.6<br>(n=13)              |

IC<sub>50</sub> in nM

Average IC<sub>50</sub> values ± S.D. from all experiments assessing effects of JAK3i and tofacitinib on 15 min pSTAT5, CD25 upregulation and proliferation as described in **Fig. 2**. n refers to the number of independent experiments, which were each 10-pt, 3-fold titrations from 10 μM to 0.51 nM or 1 μM to 0.05 nM (CD25 and proliferation), or 7-pt, 3 fold titrations from 1 μM to 1.37 nM (pSTAT5). Each proliferation experiment was conducted in technical triplicate.

**Supplementary Table 4. | Cellular selectivity of JAK3i.**

| <b>Cellular Assay</b>           | <b>Kinases</b> | <b>IC<sub>50</sub></b>          |
|---------------------------------|----------------|---------------------------------|
| IFN- $\gamma$ pSTAT1            | JAK1/2         | >10 $\mu$ M<br>(n=2)            |
| IL-2 proliferation              | JAK1/3         | 3.7 $\pm$ 1.6 nM<br>(n=9)       |
| $\alpha$ -IgM CD69<br>induction | BTK            | >10 $\mu$ M (n=2)               |
| TCR IL-2<br>production          | ITK/RLK        | 1.12 $\pm$ 0.5 $\mu$ M<br>(n=3) |

Average IC<sub>50</sub> values ( $\pm$  SD when n  $\geq$  3) of JAK3i in indicated cellular assays of potential off target kinases. n indicates number of independent experiments. See **Fig. 3c** for details.

**Supplementary Table 5 | FACS Antibody Information**

| <b>Target</b>  | <b>Fluor</b>                 | <b>Clone</b>    | <b>Source</b>  | <b>Dilution</b> |
|----------------|------------------------------|-----------------|----------------|-----------------|
| CD4            | PerCP Cy5.5<br>PE-Cy7        | GK1.5           | BD             | 1:200           |
| CD4            | BUV395                       | GK1.5           | BD             | 1:100           |
| CD25           | PerCP Cy5.5<br>APC<br>Biotin | PC61.5          | BD             | 1:200           |
| CD45.1         | PE<br>PE-Cy7                 | A20             | Biolegend      | 1:200           |
| CD45.2         | APC                          | 104             | eBioscience    | 1:200           |
| CD90.1         | PE                           | HIS51           | eBioscience    | 1:200           |
| CD90.2         | eFluor780                    | 53-2.1          | eBioscience    | 1:200           |
| STAT1 pY701    | PE                           | 4a              | BD             | 1:3.75          |
| STAT5 pY694    | AlexaFluor647                | 47/STAT5(pY694) | BD             | 1:5             |
| Rb pS807/pS811 | PE                           | J112/906        | BD             | 1:5             |
| pS6 S240/244   | Unconjugated<br>PE           | D68F8           | Cell Signaling | 1:200           |
| Anti-rabbit    | PE                           |                 | Jackson Immuno | 1:200           |

**Supplementary Table 6 | qPCR Primer & Probe Information**

| <b>IDT Primetime Assays</b>            |                       |                                                    |
|----------------------------------------|-----------------------|----------------------------------------------------|
| <b>Target</b>                          |                       | <b>Sequence</b>                                    |
| <i>Fos</i>                             | Probe                 | /56-<br>FAM/CAGCCGACT/ZEN/CCTTCTCCAGCATG/3IABkFQ/  |
|                                        | Primer 1              | GGCACTAGAGACGGACAGAT                               |
|                                        | Primer 2              | ACAGCCTTTCTACTACCATTTC                             |
| <i>Lta</i>                             | Probe                 | /56-FAM/AGCCCCAGG/ZEN/AGGAAGACAGGA/3IABkFQ/        |
|                                        | Primer 1              | AGAAGCGGACACCAGAGA                                 |
|                                        | Primer 2              | CACAGCAGGTTCTCCACAT                                |
| <i>Myc</i>                             | Probe                 | /56-FAM/CGGTGTCTC/ZEN/CTCATGCAGCACT/3IABkFQ/       |
|                                        | Primer 1              | CTTCCTCATCTTCTTGCTTTCT                             |
|                                        | Primer 2              | TTCTCTCCTTCCTCGGACTC                               |
| <i>Ifng</i>                            | Probe                 | /56-<br>FAM/TCTTGGCTT/ZEN/TGCAGCTCTTCCTCA/3IABkFQ/ |
|                                        | Primer 1              | TCCACATCTATGCCACTTGAG                              |
|                                        | Primer 2              | CTGAGACAATGAACGCTACACA                             |
| <i>Ccne1</i>                           | Probe                 | /56-<br>FAM/AAGAACTGC/ZEN/TCTCATCCTCGCCTG/3IABkFQ/ |
|                                        | Primer 1              | CTGTGGAGCTTATAGACTTCGC                             |
|                                        | Primer 2              | GACTTACCTGAGAGATGAGCAC                             |
| <b>Life Technologies Taqman Assays</b> |                       |                                                    |
| <b>Target</b>                          | <b>Exons Targeted</b> | <b>Assay ID</b>                                    |
| <i>Socs1</i>                           | 1-2                   | Mm01342740_g1                                      |
| <i>B2m</i>                             | 1-2                   | Mm00437762_m1                                      |



## Supplementary Figures

### Gatekeeper

|      |     |           |          |     |
|------|-----|-----------|----------|-----|
| JAK1 | 953 | LIMEFLPSG | SLKEYLPK | 969 |
| JAK2 | 927 | LIMEYLPYG | SLRDYLQK | 943 |
| JAK3 | 896 | LVMEYLPYG | CLRDFLQR | 912 |
| TYK2 | 969 | LVMEYVPLG | SLRDYLPR | 985 |

### Supplementary Figure 1 | JAK Family Sequence Alignment

Alignment of JAK-family kinases showing the unique cysteine (C905) in JAK3.

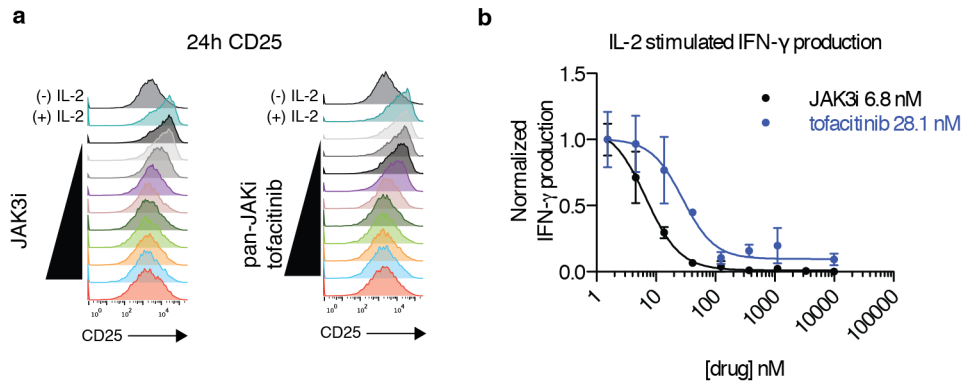

### Supplementary Figure 2 | Role of JAK3 in downstream readouts.

(a) FACS Histograms of CD25 upregulation after 24 hours of IL-2 stimulation in the presence of JAK3i or tofacitinib, as graphed in **Fig. 2 b,d**. (b) JAK3i potently inhibits IL-2 stimulated IFN- $\gamma$  production, measured by ELISA after 24 hours. Plotted as mean  $\pm$  SEM of triplicates. Data are representative of 7 (a) and 2 (b) independent experiments.

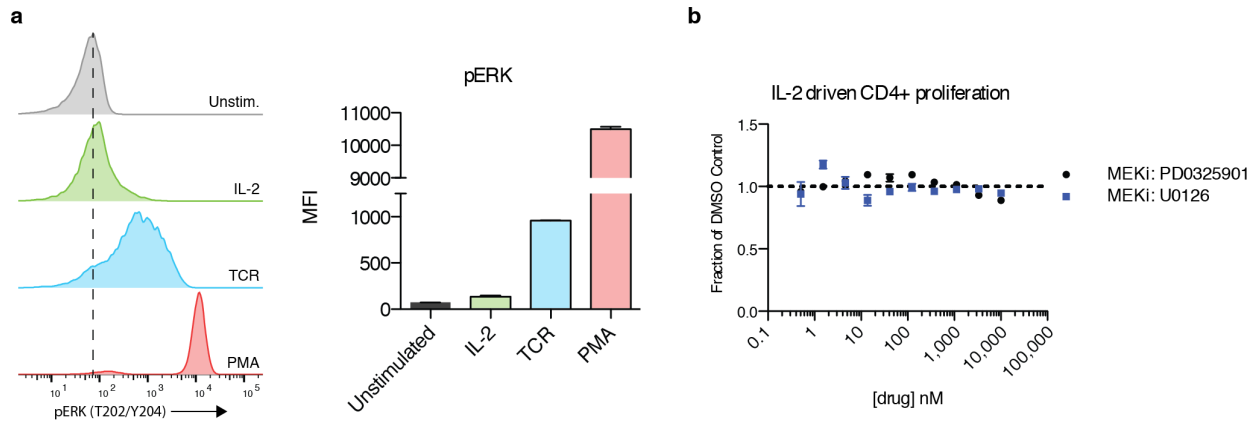

### Supplementary Figure 3 | MEK/ERK Signaling is dispensable for IL-2-driven T-cell proliferation.

(a) CD4<sup>+</sup> T-cell blasts were stimulated with IL-2 (50 U/mL) or PMA (50 ng/mL) for 15 minutes or  $\alpha$ CD3 (10  $\mu$ g/mL) crosslinking for 5 minutes and pERK was monitored by phosphoflow. Results quantified at right, MFI  $\pm$  SEM of pooled results from three independent experiments. (b) Titration of MEK inhibitors PD0325901 and U0126 in <sup>3</sup>H-thymidine proliferation assay. Plotted as mean  $\pm$  SEM of technical triplicates. Representative of 3 independent experiments.

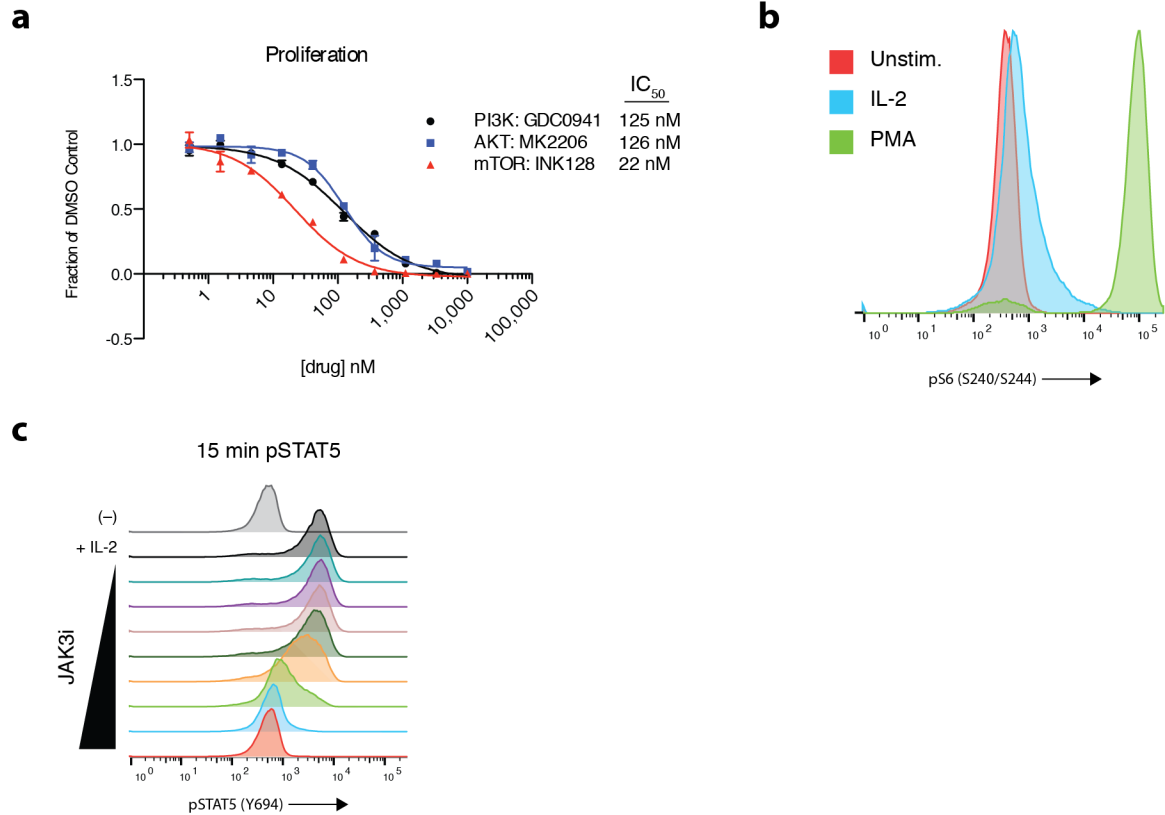

**Supplementary Figure 4 | PI3K, AKT, and mTOR are required for IL-2-driven T-cell proliferation.**

(a) Titration of PI3K (GDC0941), AKT (MK2206) or mTOR (INK128) inhibitors in the <sup>3</sup>H-thymidine proliferation assay, plotted as mean ± SEM of three replicates. Representative of 4 (GDC0941), 3 (MK2206), or 2 (INK128) independent experiments. (b) Phosphorylation of ribosomal protein S6 Ser240/244 after stimulation with IL-2 (50 U/mL) or PMA (50 ng/mL) for 15 minutes. (c) pSTAT5 histograms from cells costained with pS6 (see Fig. 2e). (b) and (c) are representative data from 2 independent experiments.

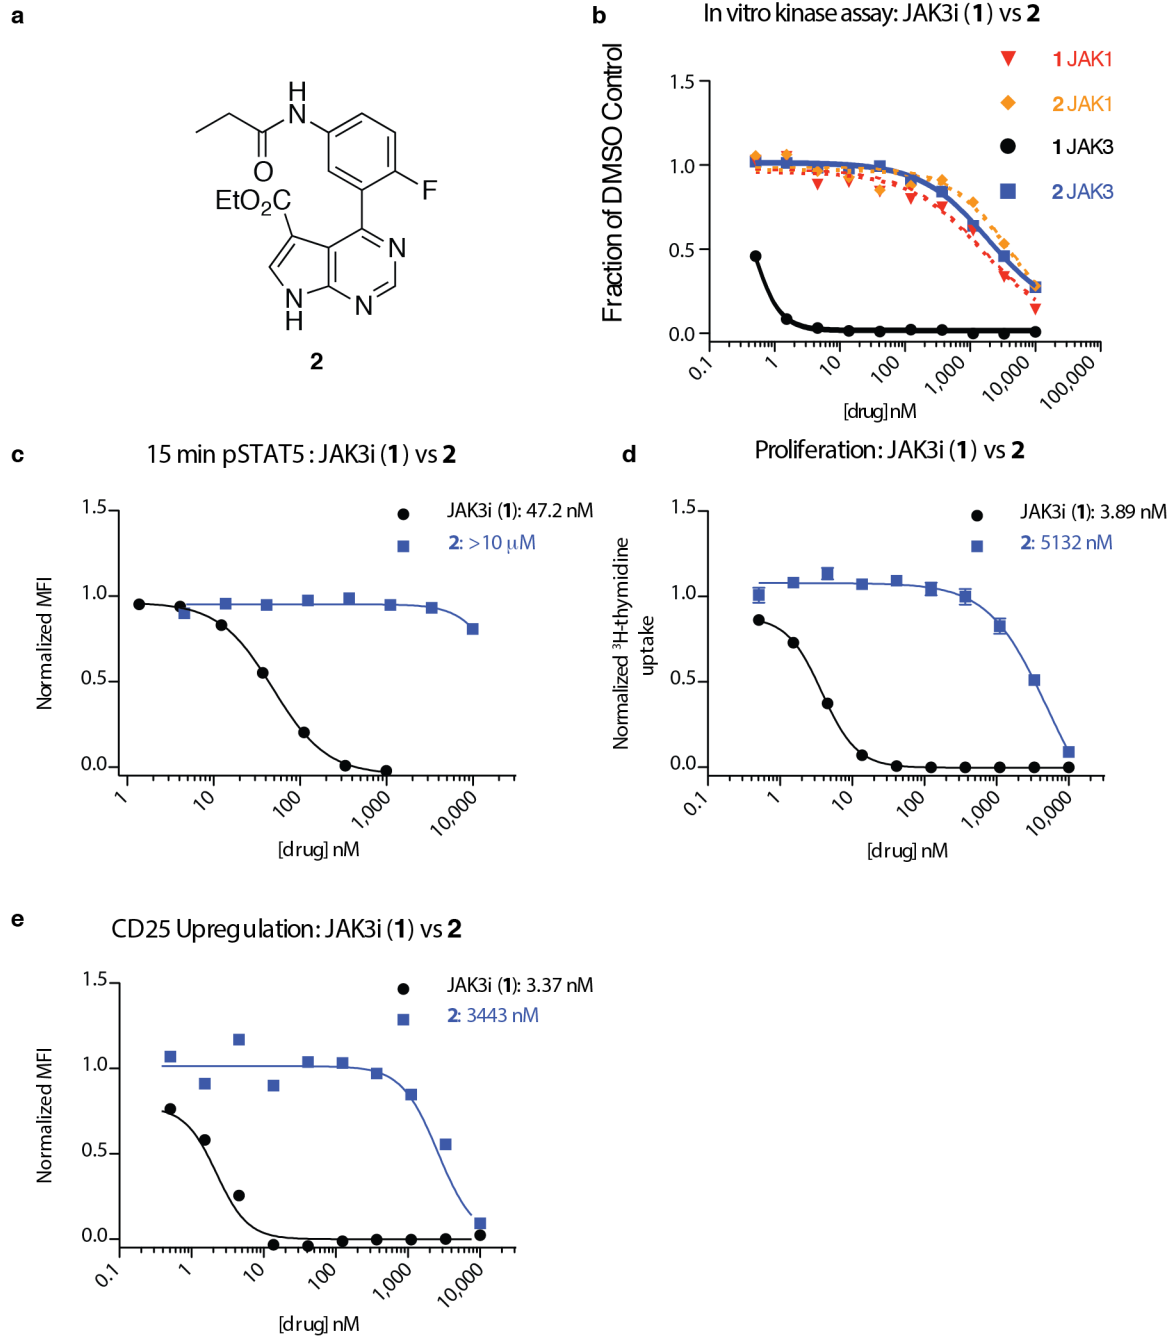

**Supplementary Figure 5 | Propionamide 2 is much less potent than JAK3i.**

(a) Structure of propionamide 2. (b) In vitro kinase assays with JAK1 and JAK3. (c-e) IL-2-stimulated STAT5 phosphorylation (15 min, c), proliferation (d), and CD25 upregulation (e) (EC<sub>50</sub> values shown for 1 and 2). Proliferation data (d) are plotted as mean ± SEM of triplicates. Panels are representative of one (b) or two (c-e) independent experiments.

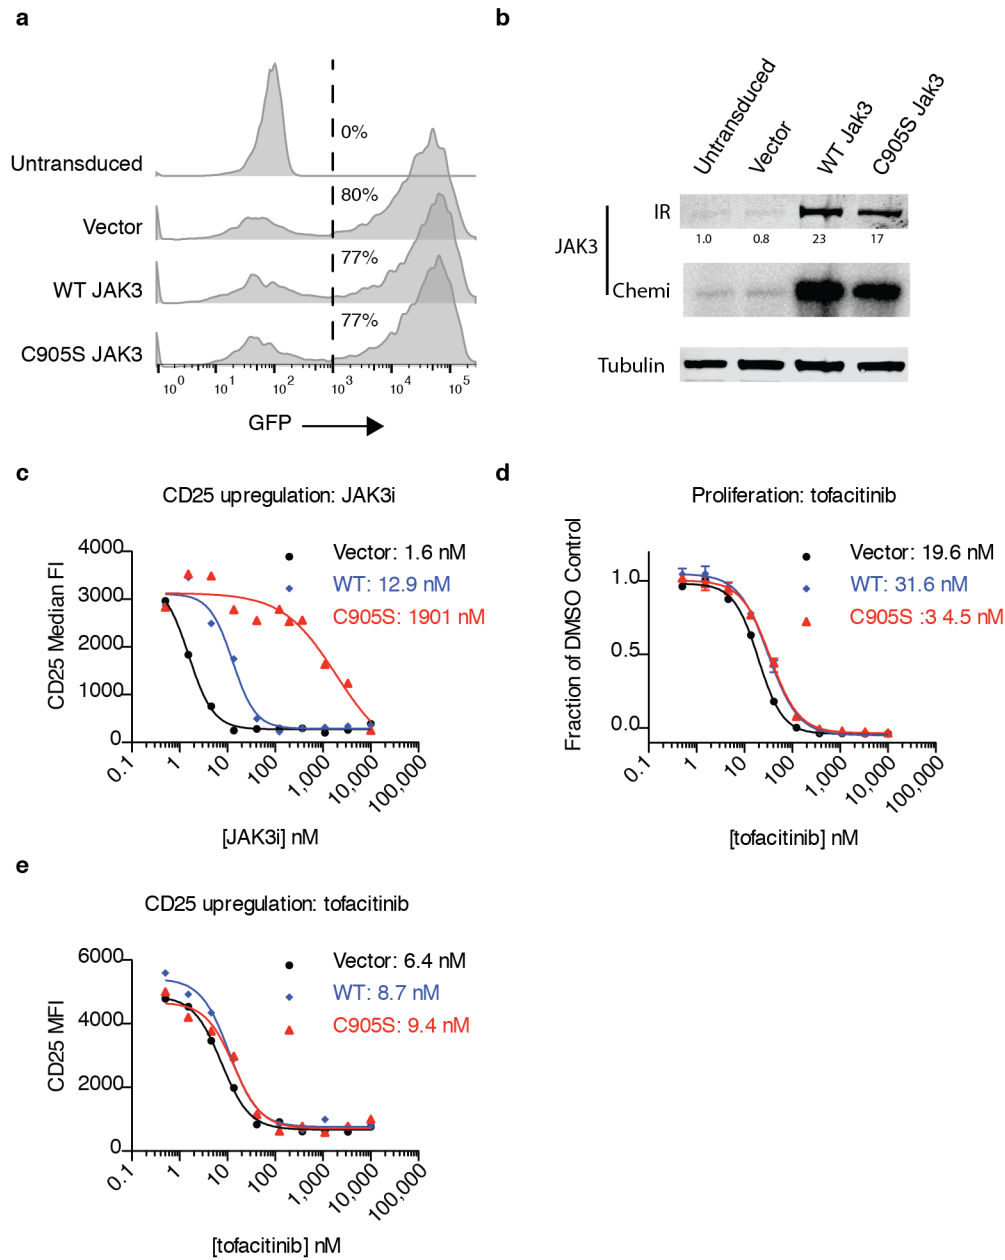

### Supplementary Figure 6 | C905S JAK3 Mutant Rescue.

(a) Transduction efficiency of primary CD4<sup>+</sup> T cells used without sorting in proliferation assays (Fig. 3a). (b) Overexpression of JAK3 in unsorted cells detected by Western blotting. Quantification from Licor data (IR), normalized to tubulin and relative to untransduced cells, is indicated below. For comparison, overexposed blots with chemiluminescence detection (Chemi) are shown. Full gel in **Supplementary Fig. 12**. (c) CD25 upregulation after 24 hours of IL-2 stimulation in GFP<sup>+</sup> cells transduced with WT JAK3, C905S JAK3 or empty vector. (d-e) Tofacitinib inhibition of IL-2-driven proliferation (c) and CD25 upregulation (d) is unaffected by C905S JAK3. Proliferation results (d) are plotted as the mean ± SEM of three replicates. All data are representative of two independent experiments.

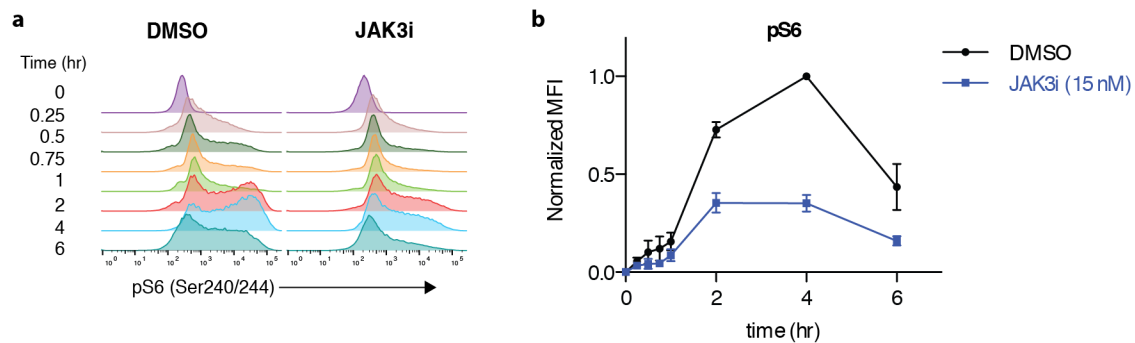

**Supplementary Figure 7 | Time course of S6 phosphorylation.**

(a) pS6 (Ser240/244) was followed by phosphoflow in the presence of DMSO or JAK3i (15 nM) over 6 hours in IL-2-stimulated CD4+ T cells. Representative of three independent experiments.

(b) cumulative quantification of all three experiments, plotted as mean  $\pm$  SEM.

**a**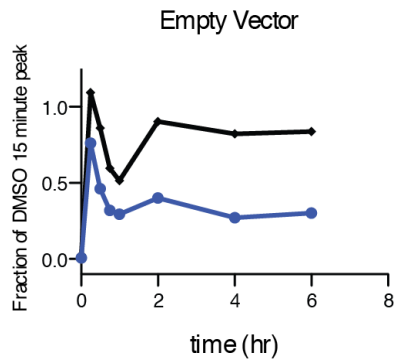**b**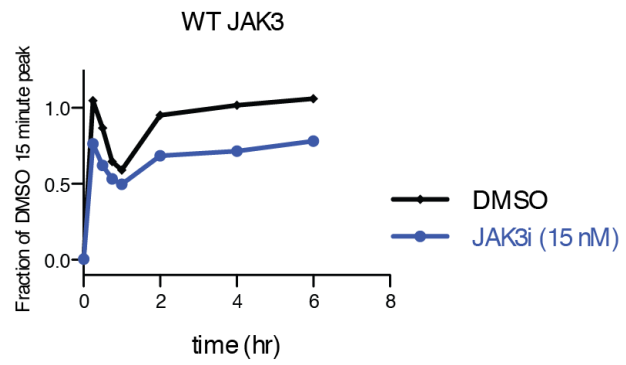**Supplementary Figure 8 | Signaling time course in overexpression controls.**

STAT5 phosphorylation was monitored over 6 hours in cells transduced with an empty vector (a) or WT JAK3 (b) and treated with or without 15 nM JAK3i. Data are representative of two independent experiments.



**a Biphasic Induction**

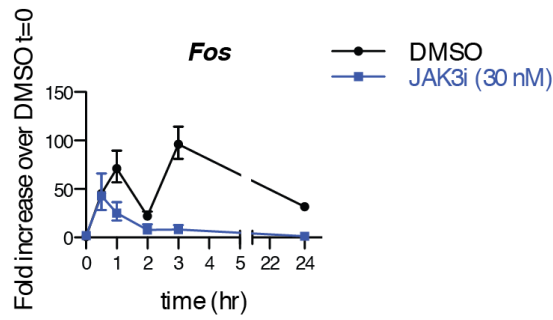

**b Early and Sustained Induction**

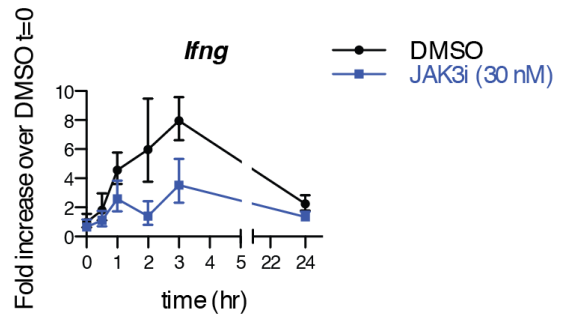

**c Delayed Induction**

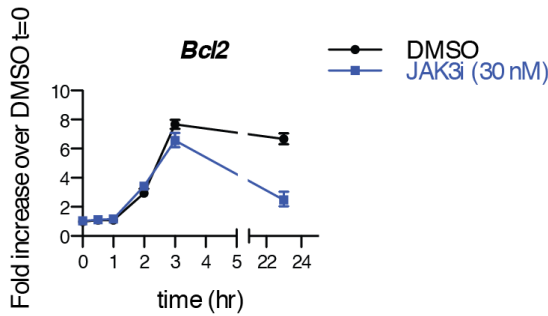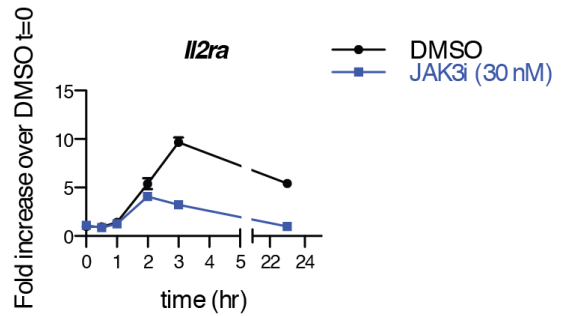

**Supplementary Figure 9 | Transcriptional time course.**

qPCR analysis of genes induced by IL-2 stimulation, grouped by pattern (mean of 3 replicates with 95% confidence interval): (a) biphasic, (b) early and sustained, and (c) delayed induction. Data are representative of three independent experiments.

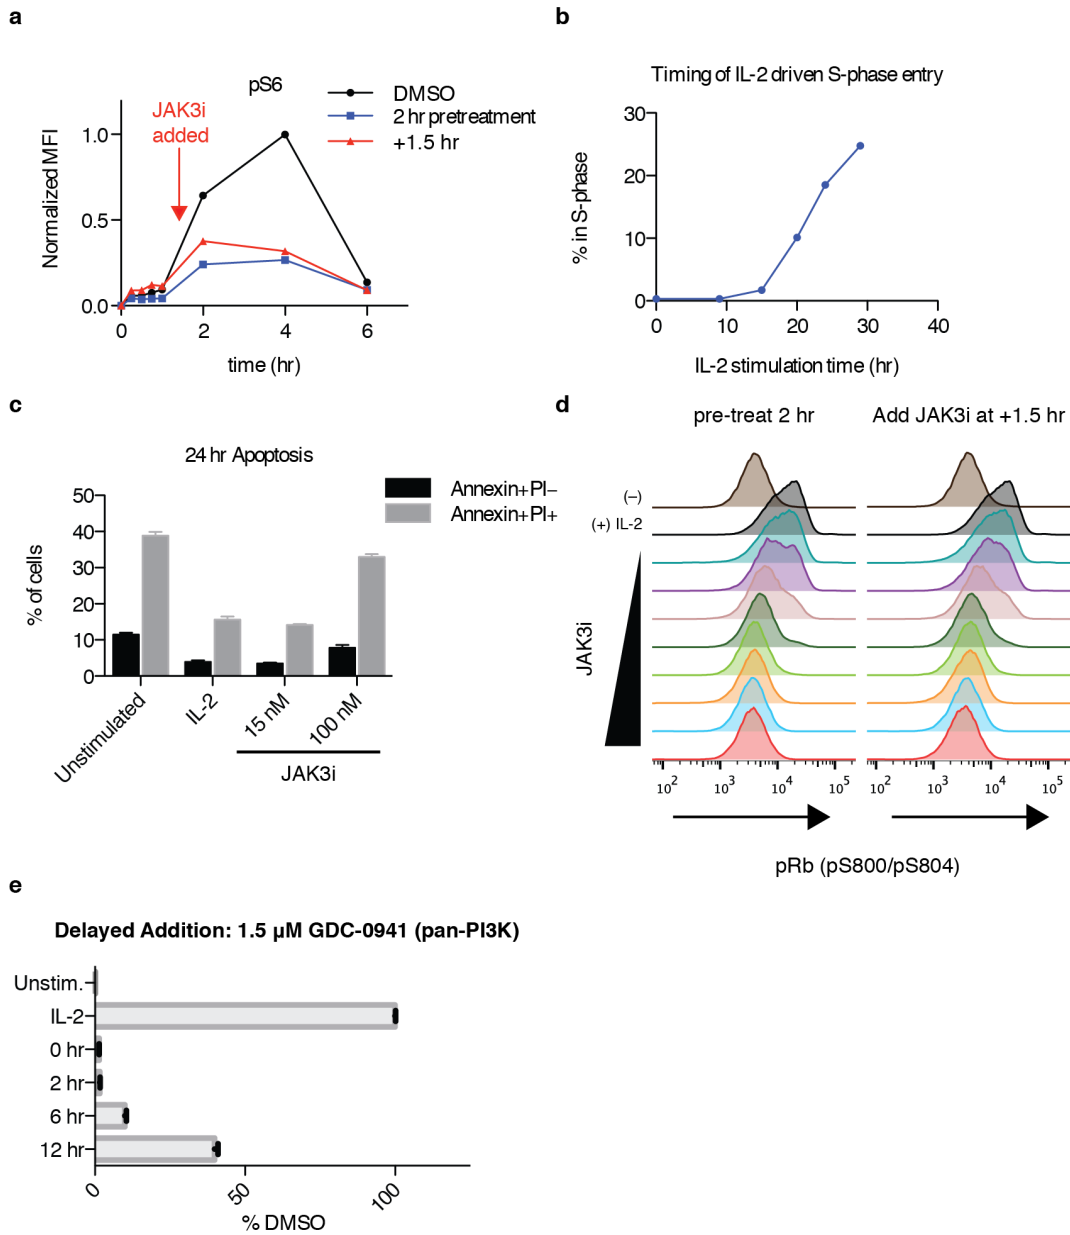

**Supplementary Figure 10 | Delayed addition studies.** (a) pS6 (Ser240/244) levels were monitored over time in T cells treated with JAK3i (15 nM) either 2 hours before or 90 min after IL-2 stimulation, as in Fig. 5a. (b) Kinetics of IL-2 stimulated S-phase entry was assessed by 1-hour pulse of EdU at the indicated times. (c) T cells were treated with 15 nM or 100 nM JAK3i, stimulated with IL-2, and incubated for 24 hours before staining with Annexin and PI to mark cells undergoing apoptosis (Annexin+PI-) and dead cells (Annexin+PI+). Plotted as mean  $\pm$  SEM of triplicates. (d) FACS histograms of pRb (pS800/p804) after 24 hours of IL-2 stimulation, with an 8-point JAK3i titration series added 2 hours before or 90 minutes after stimulation. MFI plotted in Fig. 5f. (e) PI3K inhibitor GDC-0941 was added at the indicated times after IL-2 stimulation (1.5  $\mu$ M, EC<sub>90</sub> for blocking proliferation, Supplementary Fig. 3a). After 24 hrs, cells were labeled with EdU for 1 hr, and the percentage of EdU+ cells was measured by FACS and normalized to DMSO ( $\pm$  SEM, n = 3). Data from all panels are representative of two independent experiments.

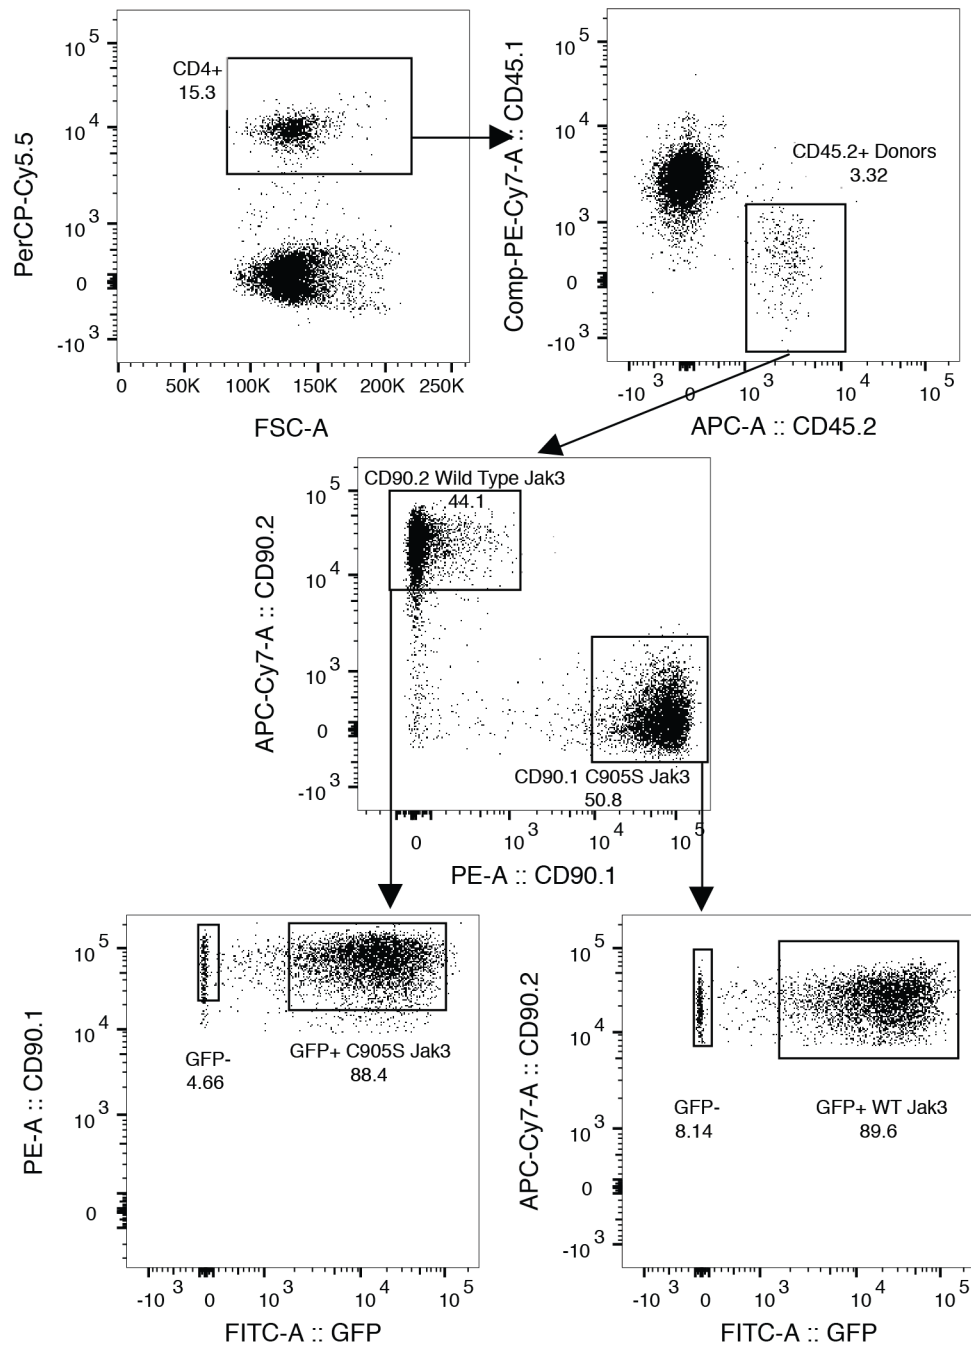

**Supplementary Figure 11 | In vivo rescue experiment gating scheme.** Splenocytes were gated on FSC/SSC lymphocyte profile and single cells (not shown), then on CD4+ cells. CD45.1–CD45.2+ identified adoptively transferred donor cells. CD90.1 and CD90.2 staining distinguished cells transduced with C905S JAK3 and WT JAK3, respectively. Finally, cells were gated on GFP+ to confirm viral transduction.

Figure 5d - tubulin & Cyclin D3

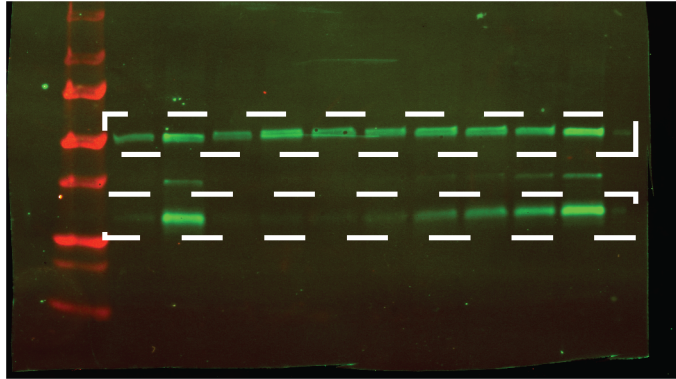

Supplementary Figure 6b - JAK3 (green) and tubulin (red)

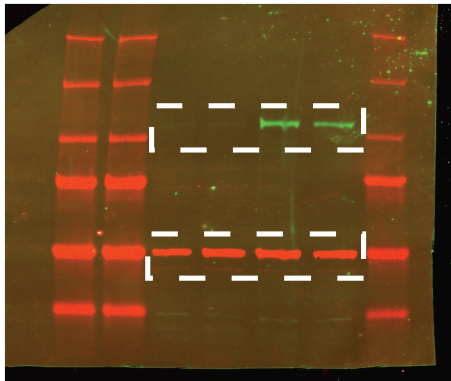

Supplementary Figure 12 | Full gels
